# Supplementary material for: Sulforaphane decreases serum selenoprotein P levels through enhancement of lysosomal degradation independent of Nrf2
Source: PubMed Central journal article supplement (PMC10587141; doi:10.1038/s42003-023-05449-y), 2023-10-19
Supplement: 42003_2023_5449_MOESM4_ESM.pdf [file 42003_2023_5449_MOESM4_ESM.pdf]

## Reporting Summary

Nature Portfolio wishes to improve the reproducibility of the work that we publish. This form provides structure for consistency and transparency in reporting. For further information on Nature Portfolio policies, see our [Editorial Policies](#) and the [Editorial Policy Checklist](#).

### Statistics

For all statistical analyses, confirm that the following items are present in the figure legend, table legend, main text, or Methods section.

n/a Confirmed

- The exact sample size ( $n$ ) for each experimental group/condition, given as a discrete number and unit of measurement
- A statement on whether measurements were taken from distinct samples or whether the same sample was measured repeatedly
- The statistical test(s) used AND whether they are one- or two-sided  
*Only common tests should be described solely by name; describe more complex techniques in the Methods section.*
- A description of all covariates tested
- A description of any assumptions or corrections, such as tests of normality and adjustment for multiple comparisons
- A full description of the statistical parameters including central tendency (e.g. means) or other basic estimates (e.g. regression coefficient) AND variation (e.g. standard deviation) or associated estimates of uncertainty (e.g. confidence intervals)
- For null hypothesis testing, the test statistic (e.g.  $F$ ,  $t$ ,  $r$ ) with confidence intervals, effect sizes, degrees of freedom and  $P$  value noted  
*Give  $P$  values as exact values whenever suitable.*
- For Bayesian analysis, information on the choice of priors and Markov chain Monte Carlo settings
- For hierarchical and complex designs, identification of the appropriate level for tests and full reporting of outcomes
- Estimates of effect sizes (e.g. Cohen's  $d$ , Pearson's  $r$ ), indicating how they were calculated

*Our web collection on [statistics for biologists](#) contains articles on many of the points above.*

### Software and code

Policy information about [availability of computer code](#)

Data collection

Data analysis

For manuscripts utilizing custom algorithms or software that are central to the research but not yet described in published literature, software must be made available to editors and reviewers. We strongly encourage code deposition in a community repository (e.g. GitHub). See the Nature Portfolio [guidelines for submitting code & software](#) for further information.

### Data

Policy information about [availability of data](#)

All manuscripts must include a [data availability statement](#). This statement should provide the following information, where applicable:

- Accession codes, unique identifiers, or web links for publicly available datasets
- A description of any restrictions on data availability
- For clinical datasets or third party data, please ensure that the statement adheres to our [policy](#)

## Research involving human participants, their data, or biological material

Policy information about studies with [human participants or human data](#). See also policy information about [sex, gender \(identity/presentation\), and sexual orientation](#) and [race, ethnicity and racism](#).

|                                                                    |                                                                                                 |
|--------------------------------------------------------------------|-------------------------------------------------------------------------------------------------|
| Reporting on sex and gender                                        | <input type="text" value="No studies with human participants are included in the manuscript."/> |
| Reporting on race, ethnicity, or other socially relevant groupings | <input type="text" value="No studies with human participants are included in the manuscript."/> |
| Population characteristics                                         | <input type="text" value="No studies with human participants are included in the manuscript."/> |
| Recruitment                                                        | <input type="text" value="No studies with human participants are included in the manuscript."/> |
| Ethics oversight                                                   | <input type="text" value="No studies with human participants are included in the manuscript."/> |

Note that full information on the approval of the study protocol must also be provided in the manuscript.

## Field-specific reporting

Please select the one below that is the best fit for your research. If you are not sure, read the appropriate sections before making your selection.

Life sciences       Behavioural & social sciences       Ecological, evolutionary & environmental sciences

For a reference copy of the document with all sections, see [nature.com/documents/nr-reporting-summary-flat.pdf](https://www.nature.com/documents/nr-reporting-summary-flat.pdf)

## Life sciences study design

All studies must disclose on these points even when the disclosure is negative.

|                 |                                                                                                                                                                              |
|-----------------|------------------------------------------------------------------------------------------------------------------------------------------------------------------------------|
| Sample size     | <input type="text" value="No statistical method was used to determine sample size."/>                                                                                        |
| Data exclusions | <input type="text" value="No data was excluded"/>                                                                                                                            |
| Replication     | <input type="text" value="Biochemical experiments were examined at least three times independently, and their average or representative ones were shown in the manuscript"/> |
| Randomization   | <input type="text" value="No randomization was performed in this study"/>                                                                                                    |
| Blinding        | <input type="text" value="No blinding was performed in this study"/>                                                                                                         |

## Reporting for specific materials, systems and methods

We require information from authors about some types of materials, experimental systems and methods used in many studies. Here, indicate whether each material, system or method listed is relevant to your study. If you are not sure if a list item applies to your research, read the appropriate section before selecting a response.

### Materials & experimental systems

| n/a                                 | Involved in the study                                           |
|-------------------------------------|-----------------------------------------------------------------|
| <input type="checkbox"/>            | <input checked="" type="checkbox"/> Antibodies                  |
| <input type="checkbox"/>            | <input checked="" type="checkbox"/> Eukaryotic cell lines       |
| <input checked="" type="checkbox"/> | <input type="checkbox"/> Palaeontology and archaeology          |
| <input type="checkbox"/>            | <input checked="" type="checkbox"/> Animals and other organisms |
| <input checked="" type="checkbox"/> | <input type="checkbox"/> Clinical data                          |
| <input checked="" type="checkbox"/> | <input type="checkbox"/> Dual use research of concern           |
| <input checked="" type="checkbox"/> | <input type="checkbox"/> Plants                                 |

### Methods

| n/a                                 | Involved in the study                           |
|-------------------------------------|-------------------------------------------------|
| <input checked="" type="checkbox"/> | <input type="checkbox"/> ChIP-seq               |
| <input checked="" type="checkbox"/> | <input type="checkbox"/> Flow cytometry         |
| <input checked="" type="checkbox"/> | <input type="checkbox"/> MRI-based neuroimaging |

## Antibodies

|                 |                                                                                                                                                                                                                                                                                              |
|-----------------|----------------------------------------------------------------------------------------------------------------------------------------------------------------------------------------------------------------------------------------------------------------------------------------------|
| Antibodies used | <input type="text" value="anti-β-actin A5441, clone AC-15, anti-GPx1 ab108427, anti-GPx4 ab125066, anti-HO-1 sc-390991, anti-LAMP2 sc-18822, anti-LC-3A/B 12741S, anti-Nrf2 sc-365949, anti-p62 5114S and anti-hSeP &amp; anti-mSeP were established at our previous report (Mita et al.,"/> |
|-----------------|----------------------------------------------------------------------------------------------------------------------------------------------------------------------------------------------------------------------------------------------------------------------------------------------|

2017). Detailed list of antibodies were shown in Supplementary information Table 1.

#### Validation

chrome-extension://efaidnbmnnnibpcajpcgltclefindmkaj/https://www.sigmaaldrich.com/specification-sheets/141/510/A5441-BULK\_\_\_\_SIGMA\_\_\_\_.pdf  
 https://www.abcam.co.jp/products/primary-antibodies/glutathione-peroxidase-1-antibody-epr3312-ab108427.html  
 https://www.abcam.co.jp/products/primary-antibodies/glutathione-peroxidase-4-antibody-epncir144-ab125066.html  
 https://www.scbt.com/ja/p/heme-oxygenase-1-antibody-f-4  
 https://www.scbt.com/ja/p/lamp-2-antibody-h4b4  
 https://www.cellsignal.jp/products/primary-antibodies/lc3a-b-d3u4c-xp-rabbit-mab/12741  
 https://www.scbt.com/ja/p/nrf2-antibody-a-10  
 https://www.cellsignal.jp/products/primary-antibodies/sqstm1-p62-antibody/5114

Selenoprotein P antibodies were validated using serum of SeP KO mice in this study and previous report (Mita et al., 2017).

## Eukaryotic cell lines

Policy information about [cell lines and Sex and Gender in Research](#)

Cell line source(s) HepG2 (derived from human liver carcinoma, which obtained from JCRB cell bank)

Authentication No further authentication was performed for the cell line

Mycoplasma contamination Not tested for mycoplasma contamination

Commonly misidentified lines (See [ICLAC](#) register) No commonly misidentified lines were used

## Animals and other research organisms

Policy information about [studies involving animals](#); [ARRIVE guidelines](#) recommended for reporting animal research, and [Sex and Gender in Research](#)

Laboratory animals male 6-week-old C57BL/6J mice (Claire Japan), Male 16-week-old KKAY mice (CLEA Japan, Kanagawa, Japan), and male 6-week-old Nrf2 (-/-) mice, Keap1flox/flox::Alb-Cre mice, and Selenoprotein P (-/-) mice were used in this study.

Wild animals No wild animals are used in this study

Reporting on sex In this study, experiments were conducted using only males, and differences between males and females were not taken into account.

Field-collected samples No field-collected samples were used

Ethics oversight The animal study was carried out in accordance with the rules and guidelines for the proper implementation of animal experiments at Tohoku University (Approval No. 2019-018-05)

Note that full information on the approval of the study protocol must also be provided in the manuscript.
